# Supplementary material for: Adalimumab dose tapering in patients with rheumatoid arthritis who are in long-standing clinical remission: results of the phase IV PREDICTRA study
Source: PubMed Central journal article supplement — Ann Rheum Dis. 2020 May 13;79(8):1023–30. doi: 10.1136/annrheumdis-2020-217246 (PMC7392484; doi:10.1136/annrheumdis-2020-217246), 2020-05-13
Supplement: annrheumdis-2020-217246supp001.pdf [file annrheumdis-2020-217246supp001.pdf]

**Supplemental Table S1. Change From DB Baseline to Week 40 (Non-Flared Patients) or to Flare Week 16 (Patients Who Flared) in Secondary Endpoints**

| Change from DB baseline, mean (SD)    | Patients Who Did Not Flare |                           | Patients Who Flared        |                                 |
|---------------------------------------|----------------------------|---------------------------|----------------------------|---------------------------------|
|                                       | Taper Arm at Week 40       | Withdrawal Arm at Week 40 | Taper Arm at Flare Week 16 | Withdrawal Arm at Flare Week 16 |
| Synovitis RAMRIS                      | 0.1 (1.3)<br>n=51          | -0.1 (0.9)<br>n=10        | 0.8 (1.8)<br>n=25          | 0.1 (1.8)<br>n=7                |
| BME RAMRIS                            | 0.0 (1.1)<br>n=52          | 1.2 (3.5)<br>n=10         | -0.1 (0.5)<br>n=26         | 0.3 (0.4)<br>n=8                |
| Composite of synovitis and BME RAMRIS | 0.1 (1.9)<br>n=51          | 1.1 (2.9)<br>n=10         | 0.7 (1.9)<br>n=25          | 0.4 (1.8)<br>n=7                |
| Tenosynovitis RAMRIS                  | 0.4 (1.0)<br>n=40          | 0.1 (0.9)<br>n=9          | 0.2 (1.2)<br>n=23          | -0.1 (0.3)<br>n=4               |
| Inflammation RAMRIS*                  | 0.6 (2.5)<br>n=39          | 1.2 (3.2)<br>n=9          | 0.8 (2.5)<br>n=22          | -0.9 (1.0)<br>n=4               |
| Erosion RAMRIS                        | 0.1 (0.5)<br>n=52          | 0.0 (1.1)<br>n=10         | 0.3 (1.0)<br>n=26          | 0.1 (0.9)<br>n=8                |
| DAS28(ESR)                            | 0.0 (0.5)<br>n=63          | 0.2 (0.4)<br>n=11         | 1.2 (1.0)<br>n=29          | 0.6 (0.8)<br>n=8                |
| CDAI                                  | 0.1 (1.3)<br>n=63          | -0.3 (0.5)<br>n=11        | 4.5 (6.1)<br>n=29          | 2.8 (4.2)<br>n=8                |
| SDAI                                  | 0.1 (1.4)<br>n=63          | -0.3 (0.6)<br>n=11        | 3.6 (6.6)<br>n=29          | 2.7 (4.2)<br>n=8                |
| HAQ-DI                                | -0.1 (0.3)<br>n=63         | 0.0 (0.2)<br>n=11         | 0.2 (0.4)<br>n=29          | 0.1 (0.2)<br>n=7                |
| SJC28                                 | 0.0 (0.4)<br>n=63          | -0.1 (0.3)<br>n=11        | 0.9 (1.8)<br>n=30          | 0.3 (0.5)<br>n=8                |
| TJC28                                 | 0.0 (0.5)<br>n=63          | 0.0 (0.0)<br>n=11         | 1.8 (2.6)<br>n=30          | 1.1 (1.9)<br>n=8                |
| ESR                                   | 1.4 (7.2)<br>n=63          | 4.7 (8.9)<br>n=11         | 8.0 (11.0)<br>n=30         | 7.0 (14.4)<br>n=8               |
| PGA                                   | 1.0 (5.3)<br>n=63          | -0.6 (2.4)<br>n=11        | 8.6 (12.5)<br>n=30         | 7.6 (20.0)<br>n=8               |
| PtGA                                  | 0.0 (7.6)<br>n=63          | -1.7 (4.5)<br>n=11        | 9.4 (13.5)<br>n=29         | 6.9 (9.3)<br>n=8                |
| PtGA RA pain                          | -0.5 (10.0)<br>n=63        | -0.9 (5.1)<br>n=11        | 8.0 (14.4)<br>n=29         | 4.3 (6.3)<br>n=8                |
| RAPID-3                               | 0.0 (2.4)<br>n=63          | 0.8 (1.6)<br>n=11         | 2.9 (4.2)<br>n=29          | 2.1 (3.0)<br>n=7                |
| SF-36 PCS                             | -0.4 (5.5)<br>n=60         | -2.1 (5.2)<br>n=11        | -3.8 (7.4)<br>n=28         | -2.5 (2.8)<br>n=7               |
| SF-36 MCS                             | -0.8 (5.9)                 | -0.4 (6.7)<br>n=11        | -4.0 (11.0)<br>n=28        | 0.1 (2.6)<br>n=7                |

|               |                               |                    |                    |                   |
|---------------|-------------------------------|--------------------|--------------------|-------------------|
| FACIT-fatigue | n=60<br>-0.4<br>(4.0)<br>n=61 | -1.5 (4.8)<br>n=11 | -4.5 (9.0)<br>n=28 | -1.7 (1.9)<br>n=7 |
|---------------|-------------------------------|--------------------|--------------------|-------------------|

Increase in scores indicates worsening for all endpoints, except for SF-36 and FACIT-fatigue in which increase in score represents better health.

LOCF analysis.

BME, bone marrow edema; CDAI, Clinical Disease Activity Index; DAS28(ESR), 28-joint Disease Activity Score based on erythrocyte sedimentation rate; DB, double-blind; FACIT, Functional Assessment of Chronic Illness Therapy; HAQ-DI, Health Assessment Questionnaire Disability Index; LOCF, last observation carried forward; MCS, mental component summary; PCS, physical component summary; PGA, Physician Global Assessment of disease activity; PtGA, Patient Global Assessment of disease activity; RAMRIS, Rheumatoid Arthritis Magnetic Resonance Imaging Score; SDAI, Simplified Disease Activity Index; SF-36, Short Form 36 Health Survey Questionnaire.

\*Composite of synovitis, BME and tenosynovitis RAMRIS.

**Supplemental Table S2. Change From DB Baseline to Flare Week 0 in Secondary Endpoints Among Patients Who Flared**

|               | <b>Taper Arm</b>     | <b>Withdrawal Arm</b> |
|---------------|----------------------|-----------------------|
| DAS28(ESR)    | 2.3 (1.2)<br>n=30    | 1.9 (1.0)<br>n=8      |
| CDAI          | 12.3 (9.6)<br>n=30   | 9.4 (9.1)<br>n=8      |
| SDAI          | 11.6 (11.2)<br>n=30  | 9.9 (8.3)<br>n=8      |
| HAQ-DI        | 0.4 (0.6)<br>n=25    | 0.3 (0.3)<br>n=7      |
| SJC28         | 2.3 (2.6)<br>n=30    | 1.9 (2.1)<br>n=8      |
| TJC28         | 4.4 (4.6)<br>n=30    | 3.6 (3.8)<br>n=8      |
| ESR           | 10.4 (12.5)<br>n=30  | 13.0 (11.9)<br>n=8    |
| PGA           | 26.5 (23.3)<br>n=30  | 17.4 (15.4)<br>n=8    |
| PtGA          | 29.5 (29.4)<br>n=30  | 21.6 (27.1)<br>n=8    |
| PtGA RA pain  | 24.4 (31.7)<br>n=30  | 17.0 (19.4)<br>n=8    |
| RAPID-3       | 6.1 (6.6)<br>n=30    | 3.9 (5.6)<br>n=8      |
| SF-36 PCS     | -10.8 (10.9)<br>n=22 | -2.4 (10.8)<br>n=5    |
| SF-36 MCS     | -4.1 (11.4)<br>n=22  | 0.4 (4.6)<br>n=5      |
| FACIT-fatigue | -7.4 (11.2)<br>n=28  | -3.6 (4.8)<br>n=8     |

Increase in scores indicates worsening for all endpoints, except for SF-36 and FACIT-fatigue in which increase in score represents better health.

LOCF analysis.

CDAI, Clinical Disease Activity Index; DAS28(ESR), 28-joint Disease Activity Score based on erythrocyte sedimentation rate; DB, double-blind; FACIT, Functional Assessment of Chronic Illness Therapy; HAQ-DI, Health Assessment Questionnaire Disability Index; LOCF, last observation carried forward; MCS, mental component summary; PCS, physical component summary; PGA, Physician Global Assessment of disease activity; PtGA, Patient Global Assessment of disease activity; SDAI, Simplified Disease Activity Index; SF-36, Short Form 36 Health Survey Questionnaire.
